# Supplementary material for: A novel pseudocapacitance mechanism of elm seed-like mesoporous MoO3−x nanosheets as electrodes for supercapacitors
Source: Royal Society of Chemistry journal article supplement (doi:10.1039/c6ta06326h), 2016-01-01
Supplement: c6ta06326h1.pdf [file c6ta06326h1.pdf]

## **A Novel Pseudocapacitance Mechanism of Elm Seeds-like Mesoporous**

### **MoO<sub>3-x</sub> Nanosheets as electrode for supercapacitor**

**Qian-Long Lu<sup>a,b</sup>, Shi-Xi Zhao<sup>a\*</sup>, Chang-Ke Chen<sup>a,b</sup>, Xia Wang<sup>a,b</sup>, Yu-Feng Deng<sup>a</sup>, Ce-Wen Nan<sup>b</sup>**

<sup>a</sup>Graduate School at Shenzhen, Tsinghua University, Shenzhen, 518055, China

<sup>b</sup>School of Materials Science and Engineering, Tsinghua University, Beijing, 100084, China

\*Corresponding Author: Tel.: +86 0755 26036372; fax: +86 0755 26036372

*E-mail:* zhaosx@sz.tsinghua.edu.cn (Shi-Xi Zhao).

## Supplementary figures and tables

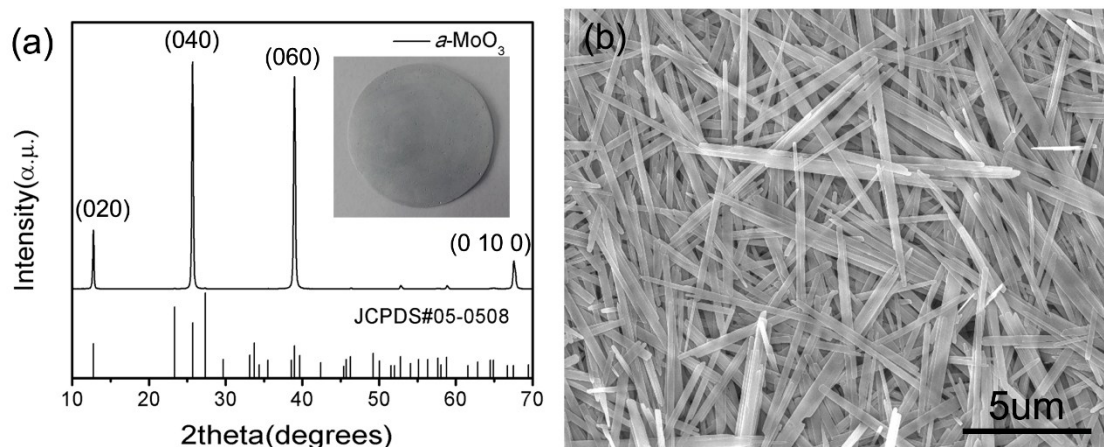

**Fig. S1** (a) XRD pattern and color, (b) SEM image of generally synthesized  $\alpha$ -MoO<sub>3</sub> nanobelts.

In the most works of  $\alpha$ -MoO<sub>3</sub> based supercapacitors,  $\alpha$ -MoO<sub>3</sub> was synthesized to be nanobelts and was white or light gray.<sup>1-5</sup> Because of the lamellar crystal structure and obvious orientation, the diffraction peaks that corresponds the crystal face  $\{0\ b\ 0\}$  ( $b=2, 4, 6, 10$ ) are very intense. We also synthesized  $\alpha$ -MoO<sub>3</sub> by a facile hydrothermal method and its color is light gray (**Fig. S1a, b**).

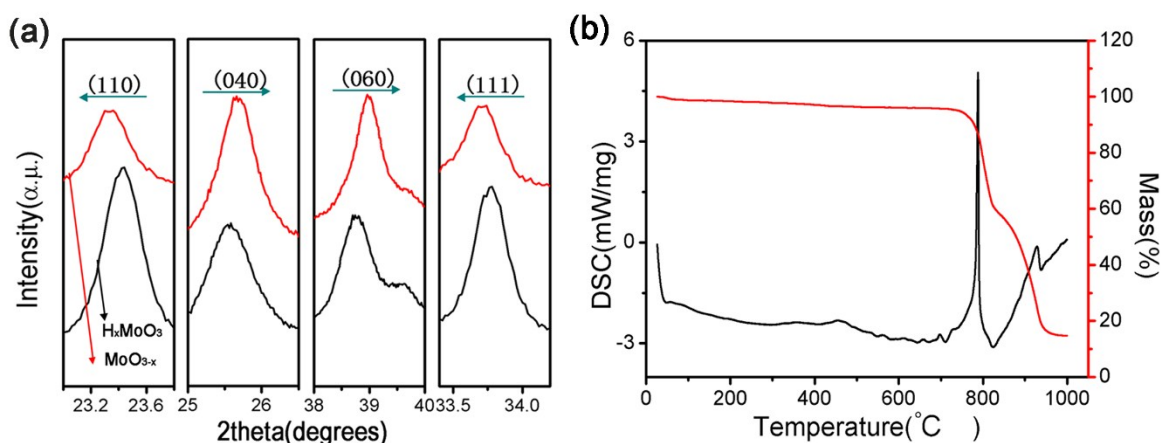

**Fig. S2** (a) XRD peak position difference between  $H_xMoO_3$  and  $MoO_{3-x}$ . (b) TAG-DSC curves of  $H_xMoO_3$  in air.

TAG-DSC curves of  $H_xMoO_3$  indicate that its thermo-stability is high and it start smelting at around 800°C. Moreover, this also confirms there are no crystal water in  $H_xMoO_3$  (**Fig. S2 (b)**).

**Table S1.** Integral area and percentage of every peak in XPS spectra.

|                          | Int Area of P1 | Int Area of P2 | Int Area of P3 | Int Area of P4 |
|--------------------------|----------------|----------------|----------------|----------------|
| $\text{MoO}_{3-x}$       | 3867(4.4%)     | 45988(52.7%)   | 2631(3.0%)     | 34808(39.9%)   |
| $\text{H}_x\text{MoO}_3$ | 2095(2.9%)     | 40145(55.7%)   | 1819(2.5%)     | 27957(38.9%)   |

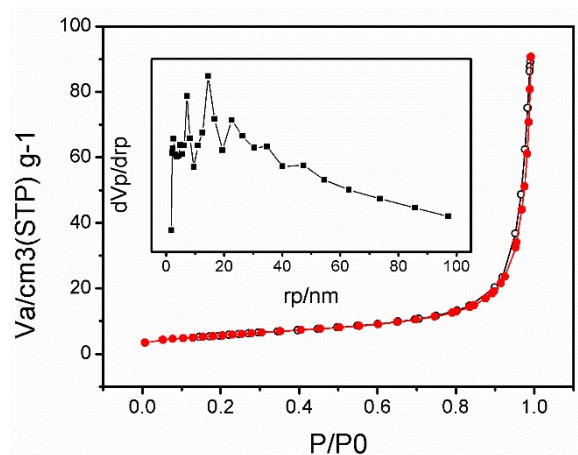**Fig. S3**  $\text{N}_2$  adsorption–desorption isotherms and pore size distributions of  $\text{H}_x\text{MoO}_3$ .**Table S2.** BET and BJH data of  $\text{H}_x\text{MoO}_3$  and  $\text{MoO}_{3-x}$ .

|                          | $a_{s,\text{BET}}$<br>([ $\text{m}^2 \cdot \text{g}^{-1}$ ]) | Total pore<br>volume( $p/p_0=0.990$ )<br>[ $\text{cm}^3 \cdot \text{g}^{-1}$ ] | Mean pore<br>diameter<br>[nm] |
|--------------------------|--------------------------------------------------------------|--------------------------------------------------------------------------------|-------------------------------|
| $\text{H}_x\text{MoO}_3$ | 20.17                                                        | 0.13                                                                           | 25.77                         |
| $\text{MoO}_{3-x}$       | 22.48                                                        | 0.145                                                                          | 25.86                         |

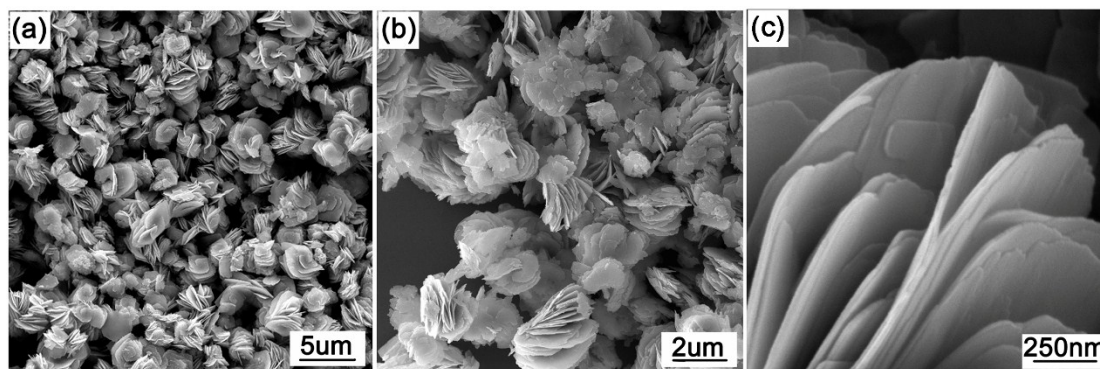**Fig. S4** Morphology of  $\text{H}_x\text{MoO}_3$  obtained at different magnifications.

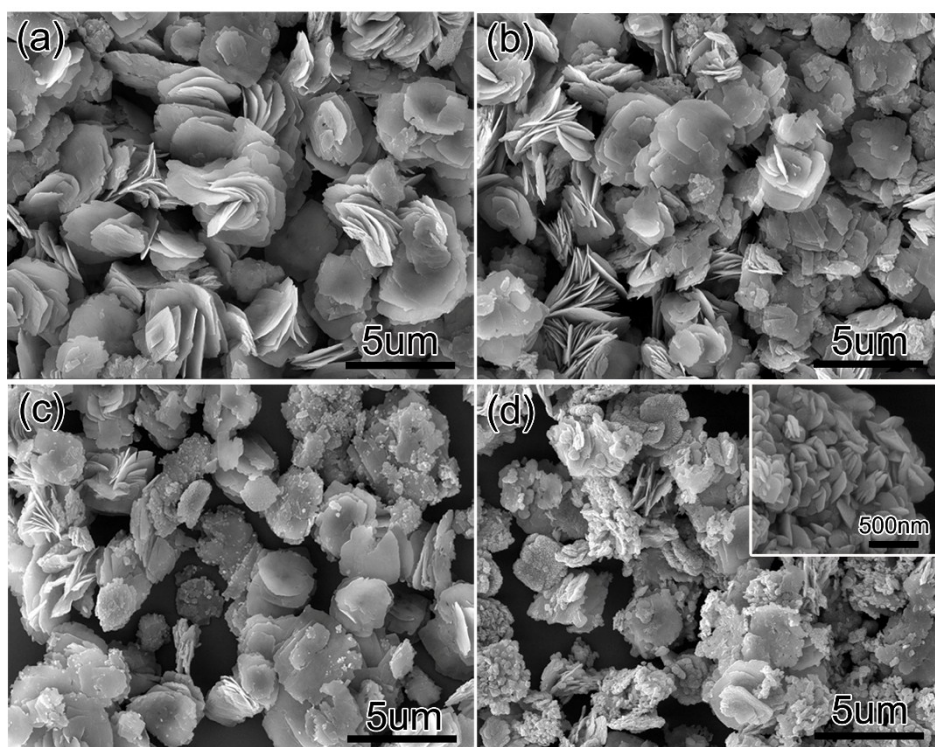

**Fig. S5** The SEM images of the products of  $H_xMoO_3$  hydrogenated at different temperatures (a)250°C; (b)300°C; (c)350 °C; (d)400 °C.

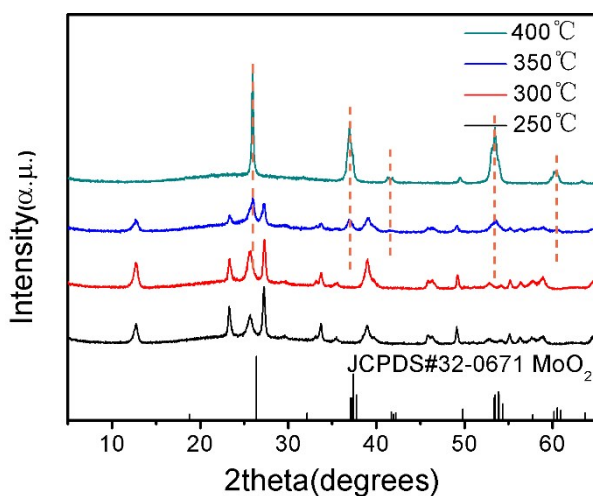

**Fig. S6** XRD patterns of the products of  $H_xMoO_3$  hydrogenated at different temperatures (a) 250°C; (b) 300 °C; (c) 350 °C; (d) 400 °C.

After hydrogenation at different temperatures, the morphology of the products took some changes. From 250 to 300°C, the main morphology remained unchanged except there are more random distributed nanoflakes. The XRD pattern of them were almost same and can be indexed to be  $\alpha$ - $MoO_3$ . From 300 to 350°C, many nano-particles emerged on the surface of nanosheets. The peaks of  $\alpha$ - $MoO_3$  and  $MoO_2$

appeared in the pattern of sample 350°C at the same time. In combination the SEM images with XRD pattern, we can concluded that part of the  $\alpha$ -MoO<sub>3</sub> was reduced to MoO<sub>2</sub>. From 350 to 400°C, the product changed significantly. Many nanosheets seems to split into nano-particles and the hierarchical structure disappeared.<sup>6</sup> The sample 400°C can be indexed to be MoO<sub>2</sub> (Fig. S5, 6).

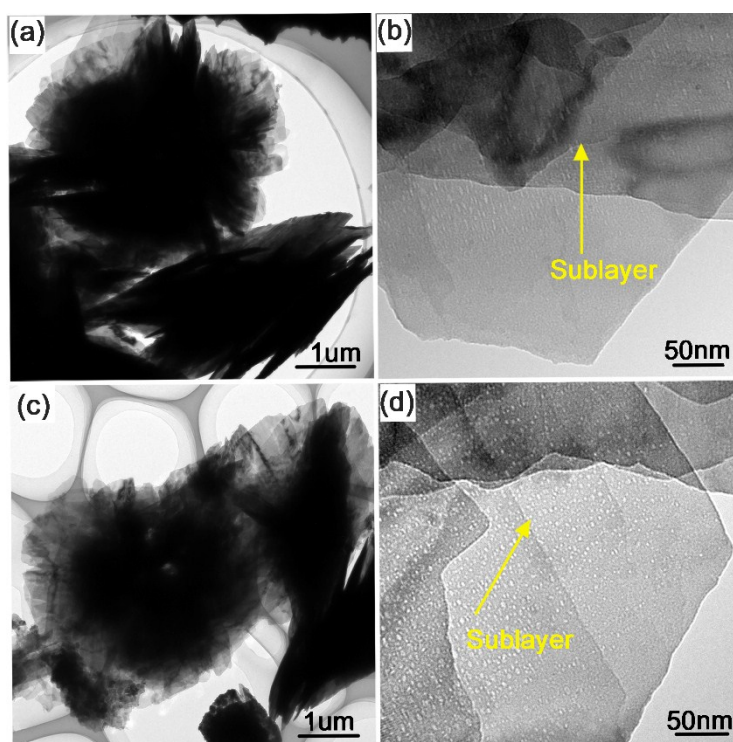

**Fig. S7** TEM images of H<sub>x</sub>MoO<sub>3</sub> (a), (b) and MoO<sub>3-x</sub> (c), (d) obtained at different magnifications.

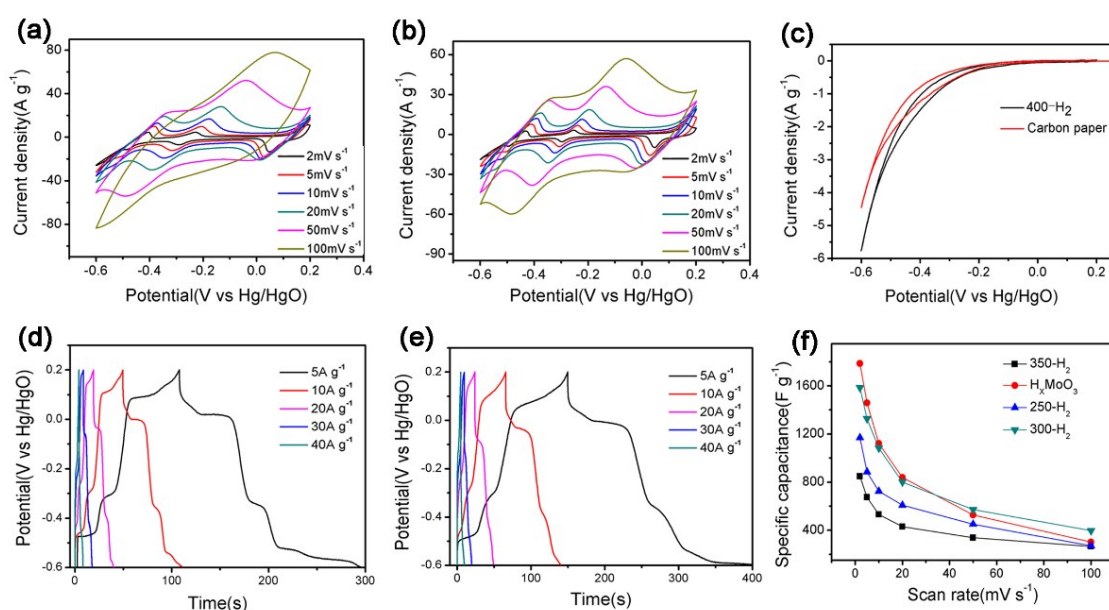

**Fig. S8** CV curves of the hydrogenated products at (a) 250°C; (b) 350°C; (c) 400°C and carbon paper

current collector; (d) GCD curves of  $H_xMoO_3$  and (e)  $MoO_{3-x}$  at different current densities; (f) specific capacitance at different scan rates of different hydrogenating products.

The products obtained at 250°C and 350°C could also deliver obvious pseudocapacitance like  $MoO_{3-x}$  and  $H_xMoO_3$ , but the 400°C product shows no capacitive behavior because  $MoO_2$  dissolved in  $H_2SO_4$  electrolyte (**Fig. S8.a, b, c**). Among those products, the  $MoO_{3-x}$  (product of 300°C hydrogenation) shows best specific capacitance.

Specific capacitance  $C_s$  ( $F \cdot g^{-1}$ ) of the electrodes were calculated from the CV and GCD curves by Eqs. (1) and (2), respectively, where  $I_1$  (A) is the response current,  $\Delta V_1$  (V) is the potential window of electrodes,  $\Delta V_2$  (V) is the potential window without IR drop,  $v$  ( $V \cdot s^{-1}$ ) is the scan rate,  $I_2$  (A) is the constant discharge current,  $\Delta t_1$  (s) is the discharging time and  $m$  (g) is the weight of the active material.

$$C_s = \frac{\int I_1 dv}{v m \Delta V_1} \quad (1)$$

$$C_s = \frac{I_2 \Delta t_1}{m \Delta V_2} \quad (2)$$

Specific capacitance  $C_a$  ( $F \cdot g^{-1}$ ) of the asymmetric supercapacitor were calculated from the CV curves by Eqs. (3), where  $m_1$  (g) and  $m_2$  (g) is the weight of the active materials for positive and negative electrodes,  $\Delta U$  (V) is potential window of asymmetric supercapacitor

$$C_a = \frac{\int I_1 dv}{v(m_1 + m_2)\Delta U} \quad (3)$$

The energy density ( $E$  ( $W \cdot h \cdot kg^{-1}$ )) and power density ( $P$  ( $W \cdot kg^{-1}$ )) of asymmetric supercapacitor can be calculated from  $C_a$  according to the following Eqs. (4) and (5), where  $\Delta t_2$  (s) is the time calculated by  $\Delta U/v$ .

$$E = \frac{1}{2} \times 3.6 C_a \Delta U^2 \quad (4)$$

$$P = \frac{3600 E}{\Delta t_2} \quad (5)$$

**Table S3.** Electrical resistivity of  $\alpha$ - $MoO_3$ ,  $H_xMoO_3$ ,  $MoO_{3-x}$ .

| Sample | Thickness(mm) | Diameter(mm) | electrical resistivity( $\Omega \cdot cm$ ) |
|--------|---------------|--------------|---------------------------------------------|
|--------|---------------|--------------|---------------------------------------------|

|                          |      |       |                        |
|--------------------------|------|-------|------------------------|
| $\alpha\text{-MoO}_3$    | 0.94 | 10.06 | $4.573 \times 10^5$    |
| $\text{H}_x\text{MoO}_3$ | 0.62 | 10.06 | $1.082 \times 10^3$    |
| $\text{MoO}_{3-x}$       | 0.64 | 10.06 | $7.882 \times 10^{-2}$ |

To detect the electrical resistivity of  $\alpha\text{-MoO}_3$ ,  $\text{H}_x\text{MoO}_3$  and  $\text{MoO}_{3-x}$ , the powder of them was pressed into disc. It is interesting to see that the electrical resistivity of  $\text{H}_x\text{MoO}_3$  is smaller than that of  $\alpha\text{-MoO}_3$ .

The electrical conductivity of  $\text{MoO}_{3-x}$  was improved a lot after hydrogenation.

**Table S4.** Fitted impedance data obtained from Nyquist plots

|                          | $R_s(\Omega)$ | CPE                   | $R_{ct}(\Omega)$ | $W_d$ |
|--------------------------|---------------|-----------------------|------------------|-------|
| $\text{MoO}_{3-x}$       | 1.84          | $2.75 \times 10^{-3}$ | 18.49            | 997.8 |
| $\text{H}_x\text{MoO}_3$ | 2.47          | $1.16 \times 10^{-3}$ | 43.46            | 6970  |

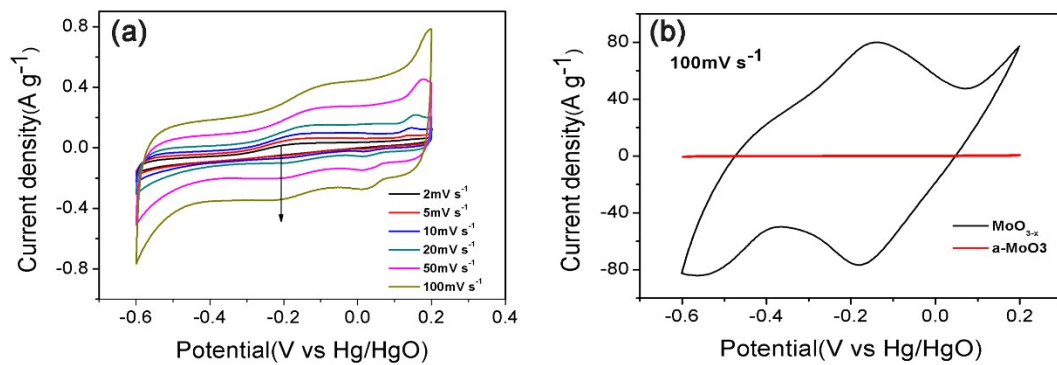

**Fig. S9** (a) CV curves of  $\alpha\text{-MoO}_3$  electrode at different scan rates; (b) CV curves of  $\alpha\text{-MoO}_3$  and  $\text{MoO}_{3-x}$  electrodes at the scan rate of  $100\text{mV s}^{-1}$ .

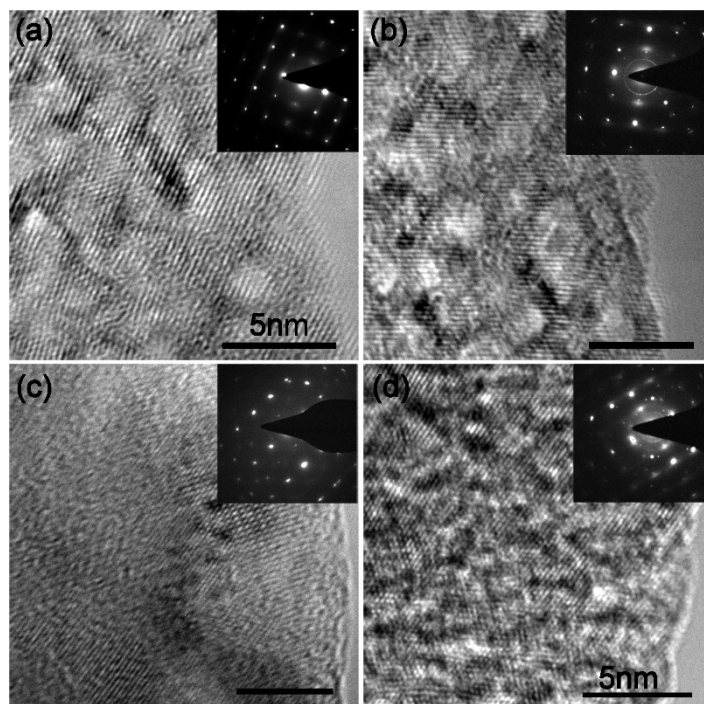

**Fig. S10** HRTEM images of (a)  $H_xMoO_3$ , (b)  $MoO_{3-x}$ , (c) products of cycle 2 and d) cycle 10000. The insets show the corresponding SAED patterns.

- 1 L. Huang, X. Gao, Q. Dong, Z. Hu, X. Xiao, T. Li, Y. Cheng, B. Yao, J. Wan, D. Ding, Z. Ling, J. Qiu and J. Zhou, *J Mater Chem A*, 2015, **3**, 17217-17223.
- 2 B. Mendoza-Sanchez, T. Brousse, C. Ramirez-Castro, V. Nicolosi and P. S. Grant, *Electrochim Acta*, 2013, **91**, 253-260.
- 3 F. Wang, Z. Liu, X. Wang, X. Yuan, X. Wu, Y. Zhu, L. Fu and Y. Wu, *J Mater Chem A*, 2016, **4**, 5115-5123.
- 4 X. Xiao, Z. H. Peng, C. Chen, C. F. Zhang, M. Beidaghi, Z. H. Yang, N. Wu, Y. H. Huang, L. Miao, Y. Gogotsi and J. Zhou, *Nano Energy*, 2014, **9**, 355-363.
- 5 X. Xiao, C. Zhang, S. Lin, L. Huang, Z. Hu, Y. Cheng, T. Li, W. Qiao, D. Long, Y. Huang, L. Mai, Y. Gogotsi and J. Zhou, *Energy Storage Materials*, 2015, **1**, 1-8.
- 6 B. Hu, L. Q. Mai, W. Chen and F. Yang, *Acs Nano*, 2009, **3**, 478-482.
